# Supplementary material
Source: ML conference proceedings conference paper supplement (https://openaccess.thecvf.com/content/CVPR2026/html/Wang_GeodesicNVS_Probability_Density_CVPR_2026_paper.html)
Supplement: Supplementary file 1 [file Wang_GeodesicNVS_Probability_Density_CVPR_2026_supplemental.pdf]

# GeodesicNVS: Probability Density Geodesic Flow Matching for Novel View Synthesis

## Supplementary Material

### 7. Derivations

This section provides detailed derivations of the Euler–Lagrange equation and functional derivative for the density-based geodesic formulation.

We recall the weighted length functional

$$S[\gamma] = \int_0^1 L(t, \gamma(t), \dot{\gamma}(t)) dt, \quad \gamma : [0, 1] \rightarrow \mathbb{R}^d \quad (18)$$

with the Lagrangian written in three equivalent forms:

$$L(t, \gamma, \dot{\gamma}) = \|\dot{\gamma}\|_{G(\gamma)} \quad (19)$$

$$= p(\gamma)^{-1} \|\dot{\gamma}\| \quad (20)$$

$$= \sqrt{\dot{\gamma}^\top G(\gamma) \dot{\gamma}}, \quad (21)$$

where the metric tensor is defined as

$$G(\gamma) = p(\gamma)^{-2} I. \quad (22)$$

#### 7.1. Euler-Lagrange Equation

The Euler-Lagrange equation is given by:

$$\frac{d}{dt} \left( \frac{\partial L}{\partial \dot{\gamma}} \right) - \frac{\partial L}{\partial \gamma} = 0. \quad (23)$$

Compute partial derivatives using  $L = p(\gamma)^{-1} \|\dot{\gamma}\|$ :

$$\frac{\partial L}{\partial \dot{\gamma}} = p(\gamma)^{-1} \hat{\gamma}, \quad (24)$$

$$\frac{\partial L}{\partial \gamma} = -p(\gamma)^{-1} \nabla \log p(\gamma) \|\dot{\gamma}\|. \quad (25)$$

The time derivative yields:

$$\begin{aligned} \frac{d}{dt} \left( \frac{\partial L}{\partial \dot{\gamma}} \right) &= -p(\gamma)^{-1} (\nabla \log p(\gamma) \cdot \dot{\gamma}) \hat{\gamma} \\ &\quad + p(\gamma)^{-1} \frac{(I - \hat{\gamma} \hat{\gamma}^\top) \ddot{\gamma}}{\|\dot{\gamma}\|}. \end{aligned} \quad (26)$$

Substituting into Euler–Lagrange:

$$\begin{aligned} -p(\gamma)^{-1} (\nabla \log p(\gamma) \cdot \dot{\gamma}) \hat{\gamma} + p(\gamma)^{-1} \frac{(I - \hat{\gamma} \hat{\gamma}^\top) \ddot{\gamma}}{\|\dot{\gamma}\|} \\ + p(\gamma)^{-1} \nabla \log p(\gamma) \|\dot{\gamma}\| = 0. \end{aligned} \quad (27)$$

Multiply by  $p(\gamma)$  and simplify using  $\hat{\gamma} = \frac{\dot{\gamma}}{\|\dot{\gamma}\|}$ :

$$\frac{(I - \hat{\gamma} \hat{\gamma}^\top) \ddot{\gamma}}{\|\dot{\gamma}\|} - (\nabla \log p(\gamma) \cdot \dot{\gamma}) \hat{\gamma} + \nabla \log p(\gamma) \|\dot{\gamma}\| = 0. \quad (28)$$

Note the identity:

$$\nabla \log p(\gamma) \|\dot{\gamma}\| - (\nabla \log p(\gamma) \cdot \dot{\gamma}) \hat{\gamma} = \|\dot{\gamma}\| (I - \hat{\gamma} \hat{\gamma}^\top) \nabla \log p(\gamma). \quad (29)$$

Thus:

$$\frac{(I - \hat{\gamma} \hat{\gamma}^\top) \ddot{\gamma}}{\|\dot{\gamma}\|} + \|\dot{\gamma}\| (I - \hat{\gamma} \hat{\gamma}^\top) \nabla \log p(\gamma) = 0. \quad (30)$$

Multiplying by  $\|\dot{\gamma}\|$  and using the fact that for constant-speed paths,  $(I - \hat{\gamma} \hat{\gamma}^\top) \ddot{\gamma} = \ddot{\gamma}$ , recovers the equivalent formulas in the main text (4):

$$\ddot{\gamma} + \|\dot{\gamma}\|^2 (I - \hat{\gamma} \hat{\gamma}^\top) \nabla \log p(\gamma) = 0. \quad (31)$$

#### 7.2. Functional Derivative

The functional derivative is:

$$\frac{\delta S}{\delta \gamma} = \frac{\partial L}{\partial \gamma} - \frac{d}{dt} \left( \frac{\partial L}{\partial \dot{\gamma}} \right). \quad (32)$$

Using our previous results:

$$\begin{aligned} \frac{\delta S}{\delta \gamma} &= -p(\gamma)^{-1} \nabla \log p(\gamma) \|\dot{\gamma}\| + p(\gamma)^{-1} (\nabla \log p(\gamma) \cdot \dot{\gamma}) \hat{\gamma} \\ &\quad - p(\gamma)^{-1} \frac{(I - \hat{\gamma} \hat{\gamma}^\top) \ddot{\gamma}}{\|\dot{\gamma}\|}. \end{aligned} \quad (33)$$

Factor out the projection identity  $(I - \hat{\gamma} \hat{\gamma}^\top)$ :

$$\frac{\delta S}{\delta \gamma} = -\frac{1}{p(\gamma) \|\dot{\gamma}\|} [(I - \hat{\gamma} \hat{\gamma}^\top) (\nabla \log p(\gamma) \|\dot{\gamma}\|^2 + \ddot{\gamma})]. \quad (34)$$

For constant-speed paths,  $(I - \hat{\gamma} \hat{\gamma}^\top) \ddot{\gamma} = \ddot{\gamma}$ , yielding:

$$\frac{\delta S}{\delta \gamma} = \frac{-1}{p(\gamma) \|\dot{\gamma}\|} \left[ (I - \hat{\gamma} \hat{\gamma}^\top) \nabla \log p(\gamma) + \frac{\ddot{\gamma}}{\|\dot{\gamma}\|^2} \right]. \quad (35)$$

This represents the normal component of the path variation, as noted in the main text (5), consistent with the geometric decomposition in the Euler–Lagrange equation.

### 7.3. Probability density along the path

To compute the functional derivative norm, we estimate the probability density along paths. Following [7, 52], we compute relative probabilities  $p(\gamma(t))/p(\gamma(a))$  since absolute density estimation is challenging.

For the conservative vector field  $\nabla \log p$ , the relative log-probability between  $\gamma(a)$  and  $\gamma(t)$  is path-independent:

$$\log \tilde{p}_a(\gamma(b)) := \log p(\gamma(b)) - \log p(\gamma(a)) \quad (36)$$

$$= \int_a^b \dot{\gamma}(t)^\top \nabla \log p(\gamma(t)) dt. \quad (37)$$

We approximate this integral using the trapezoidal rule. Let  $f(\tau) = \dot{\gamma}(\tau)^\top \nabla \log p(\gamma(\tau))$  and sample the path at  $n+1$  equally spaced points  $t_i = a + i/n$  for  $i = 0, \dots, n$ . The relative log-probability at  $\gamma(t_i)$  is:

$$\log \tilde{p}_a(\gamma(t_i)) \approx \frac{1}{n} \left( \frac{f(a)}{2} + \sum_{k=1}^{i-1} f(t_k) + \frac{f(t_i)}{2} \right). \quad (38)$$

This enables computation of  $\tilde{p}_a(\gamma(t_i)) = p(\gamma(t_i))/p(\gamma(a))$  along the curve, which is used in evaluating (5) for comparison of geodesic gradient norm in Fig. 7.

## 8. Further Implementation Details

This section provides comprehensive implementation details for the key components of our Probability Density Geodesic Flow Matching (PDG-FM) framework, complementing the methodological descriptions in Sec. 4.

### 8.1. Data-to-Data Flow Matching Implementation

**Training Configuration** Our Linear-D2D-FM, as well as Free3D and Naive FM, are trained using the linear interpolant formulation from Eq. 6. All models inherit the publicly released checkpoint from Zero-1-to-3 [30] to ensure fair comparison.

Training is conducted in the latent space at  $32 \times 32$  resolution, obtained by encoding  $256 \times 256$  input images through the VAE from Stable Diffusion [36], which provides an  $8\times$  downscaling factor. We train all models for 20,000 steps with a global batch size of 256, using the AdamW optimizer with learning rate  $1 \times 10^{-5}$  and standard weight decay.

### 8.2. Variational Distillation of Geodesics

The geodesic distillation follows Algorithm 1 using the LVIS-annotated Objaverse subset with 12 random views per object and category annotations.

**Preprocessing Pipeline** Image pairs at  $512 \times 512$  resolution are encoded to  $64 \times 64$  ambient latents  $x_0, x_1$  using the

VAE encoder. For each object pair with shared category text prompt, we apply Text Inversion [20] to fine-tune CLIP text embeddings, yielding dedicated embeddings  $c_0, c_1$  for respective views. The inversion runs for 500 steps with learning rate 0.005 using AdamW optimizer.

The ambient latents  $x_0, x_1$  and their corresponding text embeddings  $c_0, c_1$  are then processed through DDIM-F( $x, c, \tau$ ) with  $\tau = 0.6$ , classifier-free guidance scale  $\text{cfg} = 1$ , and 30 NFE (using a 50-step DDIM scheduler) to obtain the final latent pairs  $z_0, z_1$  in the DDIM-F latent space.

**GeodesicNet Optimization** The teacher network  $\phi_\xi$  operates in the DDIM-F latent space and is optimized using AdamW with learning rate  $1 \times 10^{-6}$  and uniform timestep sampling. The optimization uses score gradients computed via Eq. 12, with conditioning employing  $c_t - c_{\text{neg}}$  where  $c_t = (1-t)c_0 + tc_1$  represents time-linear text conditioning. The negative prompt targets unrealistic image artifacts: “A doubling image, unrealistic, artifacts, distortions, unnatural blending, ghosting effects, overlapping edges, harsh transitions, motion blur, poor resolution, low detail”.

The student network  $\phi_\eta$  operates in ambient latent space and is optimized using AdamW with learning rate  $1 \times 10^{-3}$ , minimizing the MSE loss between predicted  $x_t$  and DDIM-B( $z_t, c_t, \tau$ ) reconstructions. Both networks use identical UNet architectures with 128 channels and 2 residual blocks.

### 8.3. Probability Density Geodesic Flow Matching

We train two Data-to-Data Flow Matching variants: Linear-D2D-FM using linear interpolants; and PDG-FM (geodesic) using geodesic interpolants from the trained GeodesicNet  $\phi_\eta$ . Both models initialize from the Zero-1-to-3 checkpoint and train at  $64 \times 64$  latent space for 40,000 steps with global batch size 32.

### 8.4. Computational Efficiency

All models are trained on NVIDIA RTX A6000 GPUs with 48GB memory.

Our two-phase approach (geodesic distillation followed by flow matching) provides significant efficiency advantages: GeodesicNet training requires fewer samples than end-to-end metric flow matching; flow model training is detached from score function evaluation, avoiding expensive density gradient computations during FM training; and the modular design enables independent improvements to geodesic estimation and flow matching components.

## 9. Further Experiment Results

**CFM Ablation** We analyze two key design choices in Data-to-Data Flow Matching: noise augmentation and training timestep sampling. Table 5 presents the quantitative evaluation.

For noise augmentation, we compare our default setting (eps=400) with a lower-noise variant (eps=50). Both configurations are evaluated using 100 inference steps. Results demonstrate that moderate noise augmentation (eps=400) consistently outperforms the low-noise alternative across all metrics, indicating that appropriate noise regularization prevents overfitting while preserving semantic consistency.

For timestep sampling, we compare our default lognormal sampling (std=1, mean=0) against discrete uniform sampling strategies optimized for few-step inference. The discrete distributions  $U_{10}$  and  $U_4$  sample training timesteps that align with specific inference steps (10 and 4 NFE respectively). Our default lognormal sampling is evaluated using 10 inference steps. Notably, these discrete strategies outperform continuous uniform sampling when evaluated at their target inference steps, with  $U_{10}$  achieving the best overall balance across evaluation metrics.

| Method                  | Objaverse |          |        |         |
|-------------------------|-----------|----------|--------|---------|
|                         | FID ↓     | CLIP-S ↑ | SSIM ↑ | PSNR ↑  |
| Linear-D2D-FM           | 5.4324    | 88.9855  | 0.8634 | 20.8447 |
| Linear-D2D-FM(eps=50)   | 5.8050    | 88.3582  | 0.8532 | 20.0291 |
| Linear-D2D-FM           | 5.8223    | 88.9749  | 0.8688 | 21.3045 |
| Linear-D2D-FM, $U_{10}$ | 5.5146    | 88.9185  | 0.8706 | 21.5952 |
| Linear-D2D-FM, $U_4$    | 7.4414    | 88.1954  | 0.8784 | 22.2092 |

Table 5. Ablation study of noise augmentation (top) and timestep sampling (bottom) in Linear-D2D-FM.

**Extended Linear-D2D-FM Qualitative Results** Figures 9 and 10 provide additional qualitative comparisons of our Data-to-Data FM against Noise-to-Data FM and Free3D baselines. Our method maintains superior structural consistency and detail preservation, particularly in the challenging 10 NFE setting. For Free3D, we use cfg=1 at 10NFE as conditional diffusion models exhibit significant performance degradation with classifier-free guidance during accelerated inference. The deterministic coupling in Linear-D2D-FM enables more faithful geometry reconstruction and reduces artifacts observed in diffusion-based approaches under limited inference budgets.

**Extended PDG-FM Qualitative Results** Fig. 8 presents additional comparisons between our Probability Density Geodesic FM (PDG-FM) and linear interpolation baselines. Visual analysis shows that our geodesic Data-to-Data FM (PDG-FM) preserves finer details across viewpoint changes, as geodesic interpolants maintain manifold consistency throughout transformations. These observations align with our quantitative findings in the main text, demonstrating the benefits of manifold-aware interpolation.

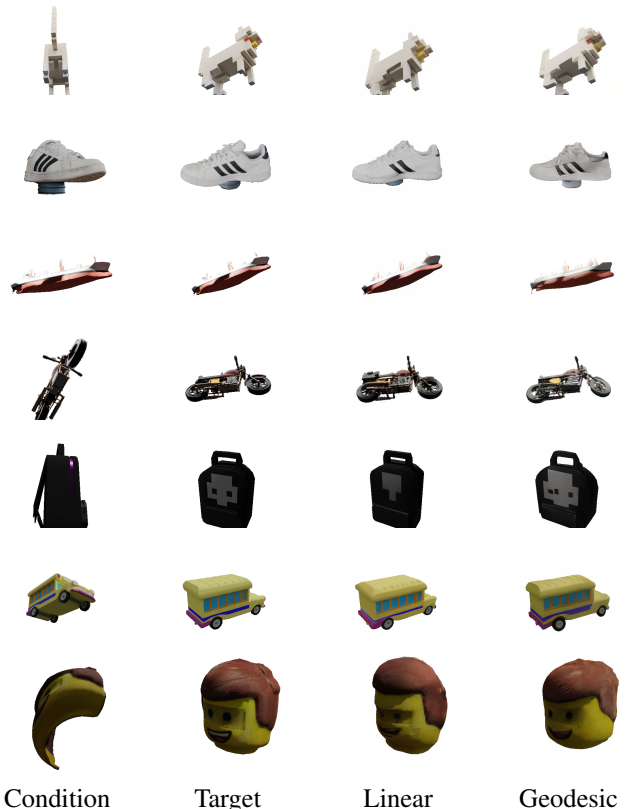

Figure 8. Extended Qualitative Results of PDG-FM (geodesic) and Linear-D2D-FM on Objaverse.

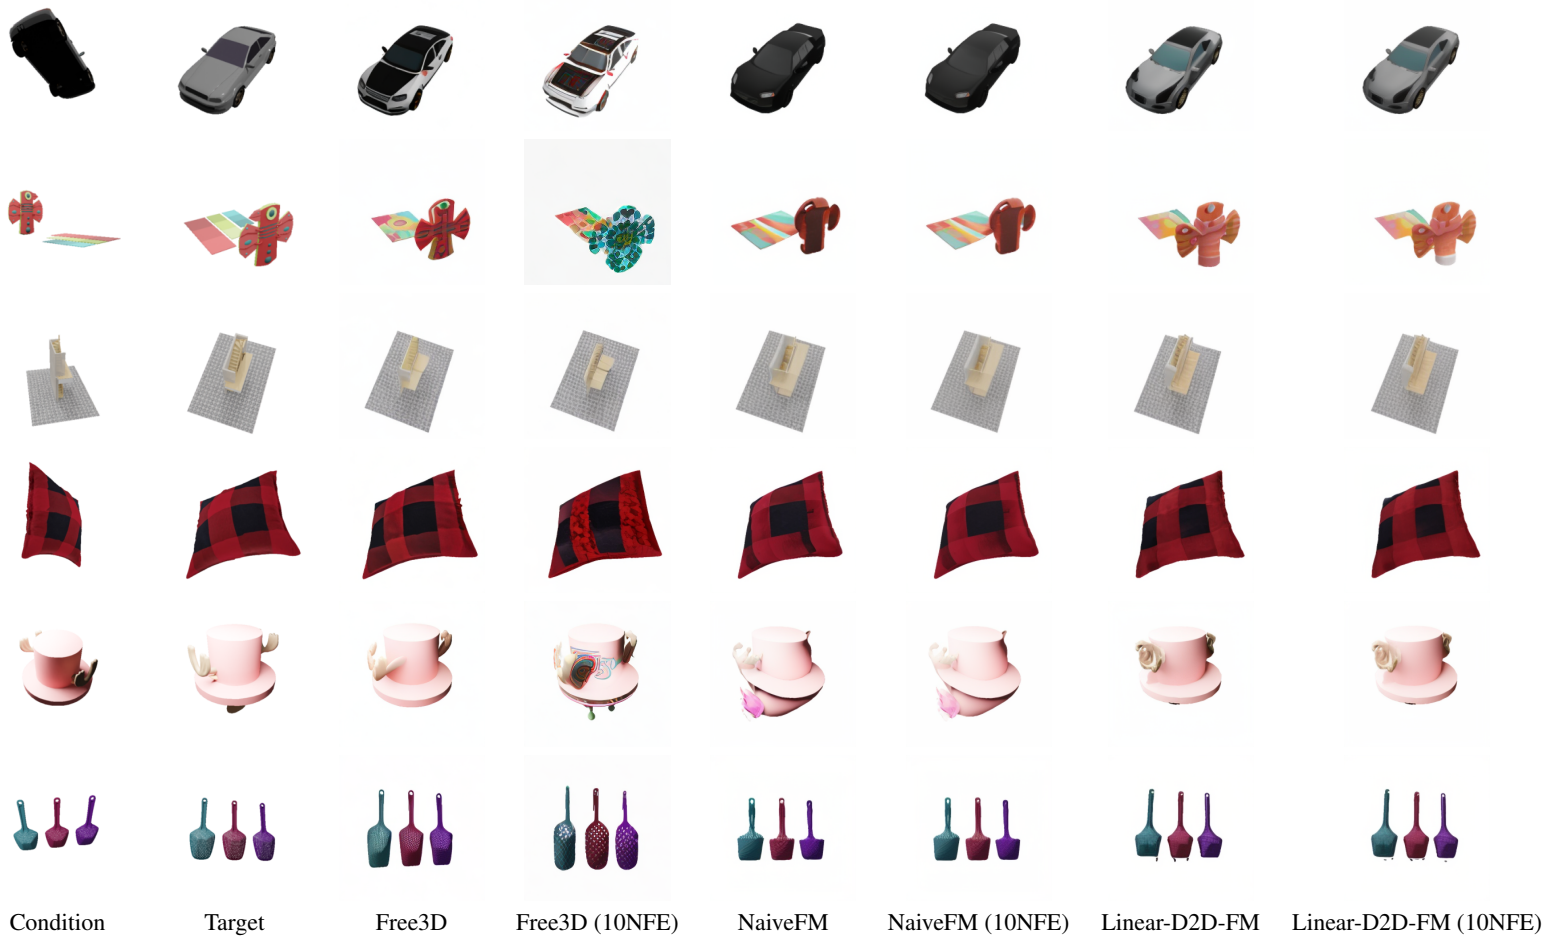

Figure 9. **Extended Qualitative Results** on Objaverse.

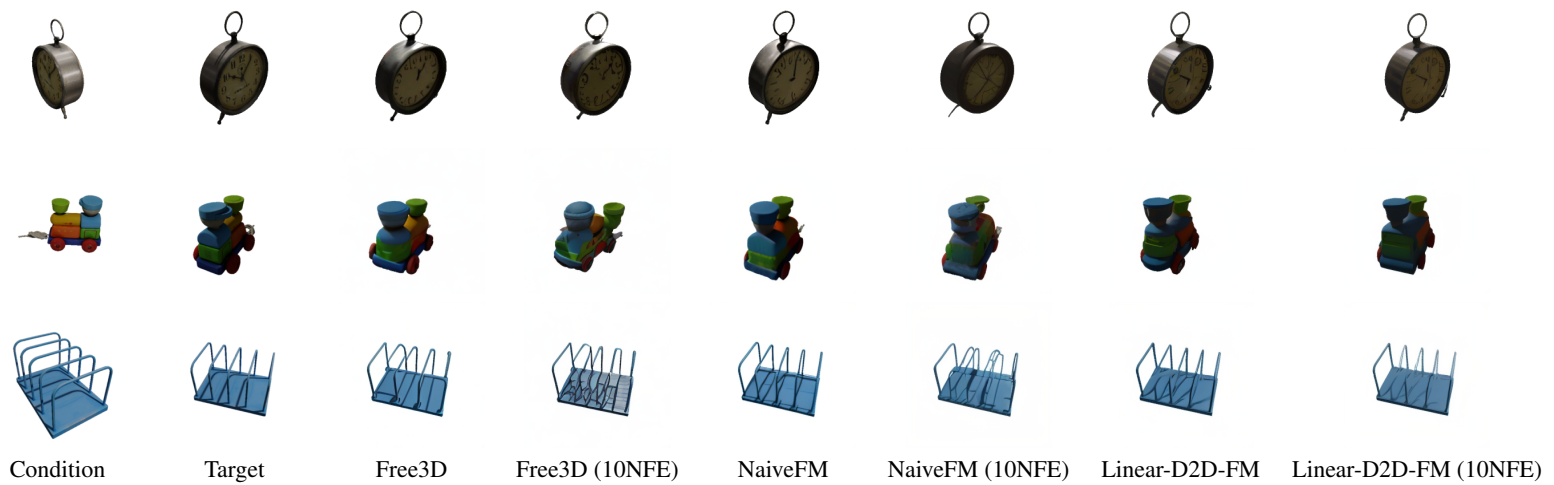

Figure 10. **Extended Qualitative Results** on GSO30.
